# Supplementary material for: Inhibitory Activity of Saussurea costus Extract against Bacteria, Candida, Herpes, and SARS-CoV-2
Source: MDPI journal article supplement (doi:10.3390/plants12030460), 2023-01-19
Supplement: s1 [file s1]

## Supplementary file

**Table S1.** GC-MS analysis conditions

|                             |                                                   |
|-----------------------------|---------------------------------------------------|
| Integration                 | Gas Chromatography real time analysis software    |
| Detector                    | GC/MS QP2012 Ultra                                |
| Column                      | Rtx-5ms                                           |
| Column length               | 30 m                                              |
| Inside column diameter      | 0.25 mm                                           |
| Film thickness              | 0.25 $\mu$ m                                      |
| Column temperature program  | 60 °C increased at 10°C to 300°C, held for 10 min |
| Detector temperature        | 200 °C                                            |
| Injector temperature        | 250 °C                                            |
| Carrier gas, inlet pressure | helium ,1.6ml/min                                 |
| Split ratio                 | 0.3 ml/min                                        |
| Injection volume            | 0.1 $\mu$ l                                       |

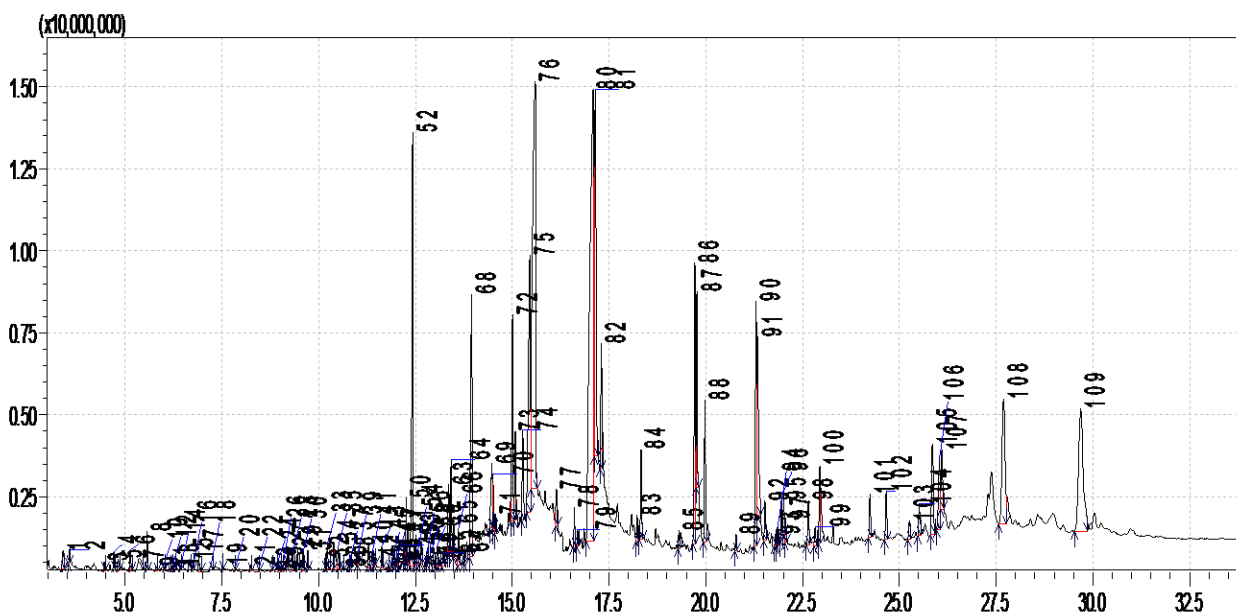

**Figure S1.** GC-MS chromatograms of acetic acid extract of *Saussurea costus*.

**Table S2.** Phytochemical in acetic acid extraction of *Saussurea costus* roots.

| ID# | Name                                                                                        | Area% |
|-----|---------------------------------------------------------------------------------------------|-------|
| 1   | Pentanoic acid, 4-oxo-                                                                      | 0.18  |
| 2   | Di(1,2,5-oxadiazolo)[3,4-b:3,4-E]pyrazine, 4,8-diacetyl-                                    | 0.04  |
| 3   | 2-Caren-10-al                                                                               | 0.03  |
| 4   | 4-Terpinenyl acetate                                                                        | 0.02  |
| 5   | Phenol, 2,6-dimethoxy-                                                                      | 0.06  |
| 6   | Phenol, 2-methoxy-4-(2-propenyl)-, acetate                                                  | 0.01  |
| 7   | Methyleugenol                                                                               | 0.03  |
| 8   | 2-Butanone, 4-(2,6,6-trimethyl-2-cyclohexen-1-yl)-                                          | 0.16  |
| 9   | .alpha.-Ionone                                                                              | 0.17  |
| 10  | Bicyclo[7.2.0]undec-4-ene, 4,11,11-trimethyl-8-methylene-                                   | 0.19  |
| 11  | 5,9-Undecadien-2-one, 6,10-dimethyl-                                                        | 0.15  |
| 12  | trans-.beta.-Ionone                                                                         | 0.10  |
| 13  | Benzene, 1-(1,5-dimethyl-4-hexenyl)-4-methyl-                                               | 0.24  |
| 14  | 2-Isopropenyl-4a,8-dimethyl-1,2,3,4,4a,5,6,8a-octahydronaphthalene                          | 0.23  |
| 15  | .beta.-Humulene                                                                             | 0.20  |
| 16  | .beta.-Bisabolene                                                                           | 0.03  |
| 17  | Caryophyllene                                                                               | 0.06  |
| 18  | Benzene, 1,2,3-trimethoxy-5-(2-propenyl)-                                                   | 0.06  |
| 19  | 3,7-Cyclodecadiene-1-methanol, .alpha.,.alpha.,4,8-tetramethyl-, [s-(Z,Z)]                  | 0.09  |
| 20  | Cyclohexane, 1-ethenyl-1-methyl-2,4-bis(1-methylethenyl)-, [1S-(1.alpha.,2.beta.,4.beta.)]- | 0.24  |
| 21  | Phenol, 2,6-dimethoxy-4-(2-propenyl)-                                                       | 0.13  |
| 22  | Caryophyllene oxide                                                                         | 0.07  |
| 23  | 1-Heptadecene                                                                               | 0.19  |
| 24  | (-)-Isolongifolol, acetate                                                                  | 0.03  |

|    |                                                                                                                                 |      |
|----|---------------------------------------------------------------------------------------------------------------------------------|------|
| 25 | Benzaldehyde, 4-hydroxy-3,5-dimethoxy-                                                                                          | 0.09 |
| 26 | Cyclopenta[1,3]cyclopropa[1,2]cyclohepten-3(3aH)-one, 1,2,3b,6,7,8-hexahydro-6,6-dimethyl-                                      | 0.04 |
| 27 | 2-Naphthalenemethanol, 1,2,3,4,4a,5,6,7-octahydro-.alpha.,.alpha.,4a,8-tetramethyl-, (2R-cis)-                                  | 0.02 |
| 28 | Tetracyclo[6.3.2.0(2,5).0(1,8)]tridecan-9-ol, 4,4-dimethyl-                                                                     | 0.05 |
| 29 | 2-Naphthalenemethanol, decahydro-.alpha.,.alpha.,4a-trimethyl-8-methylene-, [2R-(2.alpha.,4a.alpha.,8a.beta.)]-                 | 0.13 |
| 30 | Bicyclo[5.3.0]decane, 2-methylene-5-(1-methylvinyl)-8-methyl-                                                                   | 0.47 |
| 31 | Bicyclo[10.6.0]octadeca-1(12),15-diene                                                                                          | 0.29 |
| 32 | Naphthalene, decahydro-4a-methyl-1-methylene-7-(1-methylethenyl)-, [4aR-(4a.alpha.,7.alpha.,8a.beta.)]-                         | 0.13 |
| 33 | Oxacyclododeca-6,9-dien-2-one, 7-methyl-, (Z,E)-                                                                                | 0.25 |
| 34 | 6-Isopropenyl-4,8a-dimethyl-1,2,3,5,6,7,8,8a-octahydro-naphthalen-2-ol                                                          | 0.06 |
| 35 | 1-Isopropenyl-3,3-dimethyl-5-(3-methyl-1-oxo-2-butenyl)cyclopentane                                                             | 0.03 |
| 36 | 1-Heptatriacotanol                                                                                                              | 0.13 |
| 37 | 9H-Fluorene, 9-diazo-                                                                                                           | 0.18 |
| 38 | Naphthalene, 1,1'-(1,2-ethanediyl)bis[decahydro-                                                                                | 0.08 |
| 39 | 2-(4a,8-Dimethyl-1,2,3,4,4a,5,6,7-octahydro-naphthalen-2-yl)-prop-2-en-1-ol                                                     | 0.15 |
| 40 | Naphthalene, 1,2,3,5,6,7,8,8a-octahydro-1,8a-dimethyl-7-(1-methylethenyl)-, [1S-(1.alpha.,7.alpha.,8a.alpha.)]-                 | 0.84 |
| 41 | 3-Oxatricyclo[20.8.0.0(7,16)]triaconta-1(22),7(16),9,13,23,29-hexaene                                                           | 0.26 |
| 42 | 2(3H)-Benzofuranone, 6-ethenylhexahydro-3,6-dimethyl-7-(1-methylethenyl)-, [3S-(3.alpha.,3a.alpha.,6.alpha.,7.beta.,7a.beta.)]- | 0.36 |
| 43 | Caryophyllene                                                                                                                   | 0.09 |
| 44 | (-)-Isoaromadendrene-(V)                                                                                                        | 4.04 |
| 45 | Azulene, 1,2,3,5,6,7,8,8a-octahydro-1,4-dimethyl-7-(1-methylethenyl)-, [1S-(1.alpha.,7.alpha.,8a.beta.)]-                       | 0.84 |
| 46 | (-)-Spathulenol                                                                                                                 | 0.38 |
| 47 | 9.beta.-Acetoxy-3,5.alpha.,8-trimethyltricyclo[6.3.1.0(1,5)]dodec-3-ene                                                         | 0.16 |
| 48 | Tricyclo[4.2.2.0(2,5)]dec-7-ene, 7-(5-hexynyl)-                                                                                 | 2.52 |
| 49 | Eudesma-5,11(13)-dien-8,12-olide                                                                                                | 0.89 |

|    |                                                                                                                                 |       |
|----|---------------------------------------------------------------------------------------------------------------------------------|-------|
| 50 | Bicyclo[5.3.0]decane, 2-methylene-5-(1-methylvinyl)-8-methyl-                                                                   | 1.10  |
| 51 | Azuleno[4,5-b]furan-2(3H)-one, 3a,4,6a,7,8,9,9a,9b-octahydro-6-methyl-3,9-bis(methylene)-, [3aS-(3a.alpha.,6a.alpha.,9a.alpha., | 13.23 |
| 52 | .tau.-Cadinol                                                                                                                   | 0.39  |
| 53 | Kauran-18-al, 17-(acetyloxy)-, (4.beta.)-                                                                                       | 1.39  |
| 54 | 2-Butenoic acid, 2-methyl-, 2-(acetyloxy)-1,1a,2,3,4,6,7,10,11,11a-decahydro-7,10-dihydroxy-1,1,3,6,9-pentamethyl-4a,7a-epoxy-5 | 0.25  |
| 55 | 13-Docosenamide, (Z)-                                                                                                           | 0.40  |
| 56 | 9-Methyl-10,12-hexadecadien-1-ol acetate                                                                                        | 0.37  |
| 57 | Cyclohexanol, 2-methyl-3-(1-methylethenyl)-, (1.alpha.,2.alpha.,3.alpha.)-                                                      | 0.21  |
| 58 | Piperine                                                                                                                        | 0.51  |
| 59 | 6-epi-shyobunol                                                                                                                 | 0.22  |
| 60 | (R)-(-)-14-Methyl-8-hexadecyn-1-ol                                                                                              | 0.88  |
| 61 | 5.alpha.-Hydroxy-4.alpha.,8,10,11-tetramethyltricyclo[6.3.0.0(2,4)]undec-10-ene                                                 | 0.54  |
| 62 | Card-20(22)-enolide, 3,5,14,19-tetrahydroxy-, (3.beta.,5.beta.)-                                                                | 0.57  |
| 63 | Ergost-5-en-3-ol, (3.beta.)-                                                                                                    | 0.26  |
| 64 | Stigmasterol                                                                                                                    | 0.44  |
| 65 | 9.beta.-Acetoxy-3.beta.-hydroxy-3,5.alpha.,8-trimethyltricyclo[6.3.1.0(1,5)]dodecane                                            | 1.45  |
| 66 | .beta.-Sitosterol                                                                                                               | 1.14  |
| 67 | geranyl-.alpha.-terpinene                                                                                                       | 0.85  |
| 68 | 9,19-Cycloergost-24(28)-en-3-ol, 4,14-dimethyl-, acetate, (3.beta.,4.alpha.,5.alpha.)-                                          | 3.51  |
| 69 | Tricyclo[20.8.0.0(7,16)]triacontane, 1(22),7(16)-diepoxy-                                                                       | 5.42  |
